# Supplementary material for: Attacks on genetic privacy via uploads to genealogical databases
Source: eLife. 2020 Jan 7;9:e51810. doi: 10.7554/eLife.51810 (PMC6992384; doi:10.7554/eLife.51810)
Supplement: Figure 2—figure supplement 1—source data 1. [file elife-51810-fig2-figsupp1-data1.csv]

coverage	percentile	bait_sample_size	.cM_totalbp	1cM_totalbp	3cM_totalbp	5cM_totalbp	8cM_totalbp	.1cM_fration	1cM_fraction	3cM_fraction	5cM_fraction	8cM_fraction
average_of_haplotypes	50	100	285715092.25	250332348.25	19189658.75	3736203	0	0.102653047014562	0.0899405702086181	0.00689454983404766	0.00134236038843673	0
average_of_haplotypes	50	200	476157004.5	418910297.75	39669118	11241849	0	0.171075902866491	0.150508039848969	0.0142525051897401	0.00403902378708735	0
average_of_haplotypes	50	300	620656097.25	548834499.25	58057617	17381274.75	3065389.75	0.222992208878944	0.197187811154991	0.0208592106231463	0.00624482522093569	0.00110134748447019
average_of_haplotypes	50	400	737192371	657423481.5	75925914.75	23440994	4675328.25	0.264861903244593	0.236202165672949	0.0272790157323423	0.00842198933280208	0.00167977367550404
average_of_haplotypes	50	500	834105850.75	747897164.75	91757878.25	28124839.75	7046899.75	0.299681428929349	0.268707971323973	0.0329671972025611	0.0101048232153154	0.00253184291262673
average_of_haplotypes	50	600	914603871.75	823545912	104084089	32463485.25	8720539	0.328603132257019	0.295887405027993	0.0373958155218342	0.0116636319467117	0.00313315580535043
average_of_haplotypes	50	700	976976029.5	885360511.25	118586724	35855589	10574864.25	0.351012491144886	0.318096441705147	0.0426063896667498	0.0128823627564316	0.00379938640440461
average_of_haplotypes	50	800	1040093768	946058630.75	129752514.25	40134420.75	12816403.75	0.373689725751814	0.339904344345715	0.0466180867124385	0.0144196813255739	0.0046047371398749
average_of_haplotypes	50	871	1079466342.25	985060378.25	138864388.75	44751684	14341100.5	0.387835687324027	0.353917073558719	0.0498918433560702	0.0160785931378563	0.00515253727856603
IBS1	50	100	496691853.5	444193371.5	37602756.5	7421463	0	0.178453758909144	0.15959186016064	0.0135100932207463	0.00266641773893144	0
IBS1	50	200	753509632.5	683010953.5	76282906.5	22065210.5	0	0.27072444483705	0.245395351603434	0.0274072773884136	0.0079276914390675	0
IBS1	50	300	916238538	846693875	108681106.5	34048600.5	5988266	0.329190442749065	0.304204112820423	0.039047453346907	0.0122331395250491	0.00215149205592482
IBS1	50	400	1023185078.5	959541875	138356254.5	45483396	9218409.5	0.367614693157179	0.344748667041462	0.0497092785197356	0.0163414860279224	0.00331203303385519
IBS1	50	500	1099455923.5	1042961414.5	165026958.5	53048384.5	14034758	0.395017637033782	0.374720027121852	0.0592916530805721	0.0190594702759355	0.00504247312057069
IBS1	50	600	1148995451	1102394158.5	190122181	62604761	17407433	0.412816428849396	0.39607329976836	0.0683079813215714	0.0224929296652106	0.00625422347864033
IBS1	50	700	1182803904	1147140215	209949749	68150343	21051865.5	0.424963287063879	0.412149871031847	0.075431722157451	0.0244853721549864	0.00756361213507346
IBS1	50	800	1198177682.5	1170761797.5	229554883	77093074	25572327.5	0.430486849696584	0.420636743040726	0.0824755458714179	0.0276983581353641	0.00918774474409752
IBS1	50	871	1211265995	1184943686	247728178.5	82466454	28128484.5	0.435189279476626	0.425732077891543	0.0890049319905756	0.0296289310897829	0.0101061327180447
IBS2	50	100	36933722	27059085	0	0	0	0.0132697193943515	0.00972191389261841	0	0	0
IBS2	50	200	93481599.5	71187034	52319.5	0	0	0.0335865037891429	0.0255764086190978	1.87975932632182e-05	0	0
IBS2	50	300	153818479	118064156	1643746	0	0	0.0552646184426241	0.0424186390055934	0.000590572706850063	0	0
IBS2	50	400	214704980	168875032	3157553	0	0	0.0771402036645496	0.0606742068224842	0.00113446032552021	0	0
IBS2	50	500	271438014.5	216634069	4279222	0	0	0.0975235121273431	0.0778332957313803	0.00153745877997716	0	0
IBS2	50	600	324983238.5	259343860.5	5924707	0	0	0.116761489209309	0.0931782682363518	0.00212865628283416	0	0
IBS2	50	700	370221510	300046815	7972036.5	0	0	0.13301490576696	0.107802215011498	0.00286423034636282	0	0
IBS2	50	800	416027467	339873434.5	9939738	72083	0	0.149472283010979	0.122111308072593	0.00357119529175459	2.58983154501201e-05	0
IBS2	50	871	447284350.5	368215754	11101806.5	389008	0	0.160702401469848	0.132294268423842	0.00398870866644276	0.000139764603257638	0
IBS1+	50	100	536619926.5	475607266	38266005	7421463	0	0.192799302655512	0.170878390261742	0.0137483882261542	0.00266641773893144	0
IBS1+	50	200	857119242.5	762966797.5	78063624.5	22277202	0	0.307949787337278	0.274122259057238	0.0280470620323894	0.00800385673101905	0
IBS1+	50	300	1081656744.5	977481372	112774588.5	34390629	6036667.5	0.388622665230512	0.351194052948298	0.0405181785959309	0.0123560251150763	0.00216888197192803
IBS1+	50	400	1256643227	1141563293	143581183.5	46126113	9316955	0.45149262240893	0.410146168561129	0.0515865153085274	0.016572404380532	0.00334743891936481
IBS1+	50	500	1386907489	1273235773	173781831.5	55274395.5	14093799.5	0.498294572232787	0.457454069496712	0.0624371445651071	0.0198592418597131	0.00506368582525346
IBS1+	50	600	1495261175	1382928784	196188965	63883504.5	17441078	0.537224388419839	0.496865084598075	0.0704876836896712	0.0229523625764767	0.00626631161070086
IBS1+	50	700	1584261793	1469854130	222519381.5	69218525.5	21149728.5	0.569200944337595	0.52809602714096	0.0799477981750568	0.0248691537309932	0.00759877280880923
IBS1+	50	800	1657706534	1541961356	244782651	77684737	25632807.5	0.595588512426748	0.55400304662102	0.0879466491726851	0.0279109335694355	0.00920947427974979
IBS1+	50	871	1706045826	1591670198.5	264915822	84532076	28677765	0.612956078050424	0.571862670717205	0.095180188475561	0.0303710773677778	0.0103034807704232
average_of_haplotypes	10	100	163841769.85	134786029.2	6067888.4	0	0	0.0588658329908755	0.0484265513712068	0.00218009916206768	0	0
average_of_haplotypes	10	200	297865597.05	251503127.55	15221052.2	220348.65	0	0.107018536883027	0.0903612132400385	0.00546869041741249	7.91678876671075e-05	0
average_of_haplotypes	10	300	398932284.35	342613143	23250418.85	1788957.05	0	0.143330246290156	0.123095643283036	0.00835351860667174	0.000642744808174137	0
average_of_haplotypes	10	400	496950011.5	426038914.9	33980983.2	2939011.65	0	0.178546511115905	0.153069242569081	0.012208845667062	0.00105594177300165	0
average_of_haplotypes	10	500	563401837.5	488844084.95	41983292.7	4524240.15	0	0.202421632184458	0.175634176129745	0.0150839526376444	0.00162549004032572	0
average_of_haplotypes	10	600	628587119.6	548253654.3	49452641.5	6201615.55	0	0.225841703470765	0.196979122480231	0.0177675750094849	0.00222814527439577	0
average_of_haplotypes	10	700	680900069.5	595246458.05	55440380.2	7557782.05	0	0.244636943383595	0.213862915543826	0.0199188776146136	0.00271539508114473	0
average_of_haplotypes	10	800	734243748.7	646032627.3	62021579.55	9149970.1	0	0.263802508512566	0.232109606604682	0.0222834015218653	0.00328744380795704	0
average_of_haplotypes	10	871	765153589.6	675674372.4	67220323.6	10184447.4	0	0.274907939892243	0.242759430628264	0.0241512304600523	0.00365911562296735	0
IBS1	10	100	300553830.7	250031228.4	11886490.8	0	0	0.107984377969987	0.0898323824686019	0.00427063369079187	0	0
IBS1	10	200	516203106.7	447503878.9	29925503.3	199983.500000002	0	0.18546385269271	0.160781274654281	0.0107517739892486	7.18510018703322e-05	0
IBS1	10	300	658495645	581545079.6	45567541.4	3577914.1	0	0.236587377561149	0.208940220578306	0.0163717181785387	0.00128548961634827	0
IBS1	10	400	775354325.3	694374522	62586966.9	5823524	0	0.27857290765138	0.249478107338518	0.0224865365182141	0.00209230278405928	0
IBS1	10	500	851730513.2	765741182.3	79074762.1	8689379.6	0	0.306013699614976	0.275119052930002	0.0284103482514463	0.00312196071121677	0
IBS1	10	600	927726052.2	845990775.1	92516569.8	11351250.4	0	0.333317730271634	0.303951499818701	0.0332397834308152	0.00407833003083254	0
IBS1	10	700	979058854.6	898819243.9	103876678.7	14628440.8	0	0.351760818232649	0.322931957759259	0.0373212961847228	0.00525577423777877	0
IBS1	10	800	1020720323.1	947662720.4	114271108.4	17510275.2	0	0.366729144375127	0.340480669134722	0.0410558552249222	0.00629117310250704	0
IBS1	10	871	1043582084.6	970711014.3	121679855.1	19020152.9	0	0.374943024361704	0.348761567349409	0.0437177041924546	0.00683364898400062	0
IBS2	10	100	12328047.6	7963558.8	0	0	0	0.00442927827128305	0.00286118443888268	0	0	0
IBS2	10	200	37803608	25640060.8	0	0	0	0.0135822560816931	0.00921208027910407	0	0	0
IBS2	10	300	66463757	46777745.3	0	0	0	0.023879407693716	0.0168065258635847	0	0	0
IBS2	10	400	98596466	72118242.8	0	0	0	0.0354241968111072	0.0259109776471949	0	0	0
IBS2	10	500	127462833.8	95775119.8	0	0	0	0.0457954396725807	0.0344105304281654	0	0	0
IBS2	10	600	156687003.1	116064669.8	14936.9	0	0	0.056295235120871	0.0417002543053761	5.36659889359349e-06	0	0
IBS2	10	700	184984911.1	138194792.1	388852.1	0	0	0.0664622391018718	0.0496512675578093	0.000139708590780651	0	0
IBS2	10	800	211719832.1	162496579.8	846977.3	0	0	0.0760676858450989	0.0583825268541267	0.000304305943072444	0	0
IBS2	10	871	229967382.1	175166869.7	1219787.5	0	0	0.082623750466325	0.0629347675304952	0.000438250925420881	0	0
IBS1+	10	100	313087963.1	259719795.6	12135776.8	0	0	0.112487699346578	0.093313335947304	0.00436019832413536	0	0
IBS1+	10	200	557122099.2	475954439.8	30077792.8	440697.3	0	0.200165418605146	0.171003124479081	0.0108064892690059	0.000158335775334215	0
IBS1+	10	300	729801700.7	637775214.7	46365094.6	3577914.1	0	0.262206548850114	0.229142845006016	0.0166582668011245	0.00128548961634827	0
IBS1+	10	400	884341851.1	777508767.5	66023184.6	5854739.2	0	0.317730452749344	0.279346965663875	0.0237211167930346	0.00210351792627643	0
IBS1+	10	500	987266168.2	870746071.1	82997354.7	8868572.1	0	0.354709580029618	0.312845697686008	0.0298196755621451	0.00318634182592198	0
IBS1+	10	600	1091848464.1	968411297.8	96084945.1	12180523	0	0.392284393643313	0.347935314510836	0.0345218459027409	0.00437627494695619	0
IBS1+	10	700	1173207023.4	1047191135.6	108248269.6	14990998	0	0.421515275173198	0.376239700988282	0.0388919416926383	0.00538603547460732	0
IBS1+	10	800	1249394034.3	1118405821	119482437.1	18267562.4	0	0.448888098744497	0.40182604433096	0.0429282056346841	0.00656325476936245	0
IBS1+	10	871	1292156276.7	1158868067.7	128081901.2	20034611.9	0	0.464251916052735	0.41636350848835	0.0460178610869236	0.00719812853109513	0
average_of_haplotypes	90	100	457810449.65	417349460.15	80494562.65	25158360.25	8836411.45	0.164484267322351	0.149947254857623	0.0289204607955989	0.00903901266543099	0.00317478699803217
average_of_haplotypes	90	200	828981809.25	764164620.75	184361532.95	58550774.3	20065589.5	0.297840439470718	0.274552618564778	0.0662382689012224	0.0210363944712371	0.00720925830727936
average_of_haplotypes	90	300	1080172890.15	1008803212.1	259489459.4	96113543.8	31287771.4	0.388089539139223	0.362447509316485	0.0932305796862274	0.0345321209766704	0.0112412160072201
average_of_haplotypes	90	400	1237270721.1	1162973134.9	326776133	124122778.3	39883678.75	0.444532378400529	0.417838396121905	0.11740564868283	0.0445954090001626	0.0143295935737796
average_of_haplotypes	90	500	1376412801.05	1297481668.65	394697207.55	154897845.55	49772167.5	0.494523991942293	0.466165247637389	0.141808648202925	0.0556524182761245	0.0178823757966679
average_of_haplotypes	90	600	1457124204.45	1372548352.45	437244615.4	183702030.7	60966993.15	0.523522360290934	0.493135554878303	0.157095278754986	0.0660013198659357	0.0219045048158929
average_of_haplotypes	90	700	1553287289.15	1468023058.65	492866832.15	210000666.95	69870079.8	0.558072280552538	0.527438151311237	0.177079487450884	0.0754500161953125	0.0251032471898432
average_of_haplotypes	90	800	1626435151.4	1547868553.55	541537366.1	234131216.9	83258318.85	0.584353184663805	0.556125412027233	0.194566063222743	0.084119752396497	0.0299134359755279
average_of_haplotypes	90	871	1676458031	1608197795.75	587459214.45	250499142.45	89255304.35	0.602325637469656	0.577800782716054	0.211065078449924	0.0900004968044431	0.0320680608139614
IBS1	90	100	737482075.7	680955550.5	153716516.5	49621202.9	17559292.4	0.264965989696433	0.244656876855281	0.0552279848814643	0.0178281365331439	0.00630878423006945
IBS1	90	200	1098844704.7	1053575270.8	337185304.1	114728261.9	40131179	0.394798035500946	0.378533422771307	0.121145504081773	0.0412201034603193	0.0144185166145587
IBS1	90	300	1218316244.9	1199998153.7	462118120	185371966.2	62193140.3	0.437722326046724	0.431140917055121	0.166031947157811	0.0666013020581358	0.0223450406659403
IBS1	90	400	1265025838.7	1254639623.6	564397581.8	234300086.1	77455403.4	0.454504366122461	0.45077275846195	0.202779387827107	0.0841804245079713	0.0278285375271493
IBS1	90	500	1290671562.3	1285954674.5	634088098.4	287396404.2	96989898.3	0.463718480958683	0.462023775574789	0.227818120715425	0.103257116590622	0.0348469816967727
IBS1	90	600	1301211553.3	1294986404.8	709957044.3	331853217.6	118677250.2	0.467505337939655	0.465268737637547	0.255076668414415	0.119229767248063	0.042638914340863
IBS1	90	700	1306775743.6	1306243621.2	787620010.2	376037986.3	132517788	0.46950446610599	0.46931328269557	0.2829797799618	0.135104676420589	0.0476116071247887
IBS1	90	800	1317537011.1	1314347315	847390294.4	418773525.9	155057500.9	0.473370824336892	0.472224815488928	0.304454325621039	0.150458899822666	0.0557097799927234
IBS1	90	871	1325962217.7	1314512355.9	881631269.7	444309873.9	168277313.3	0.476397871744176	0.472284112150975	0.316756582458839	0.159633717684687	0.0604594556683558
IBS2	90	100	87575476.3	71677336.4	3130809.4	0	0	0.0314645243803937	0.0257525667454403	0.0011248517605455	0	0
IBS2	90	200	263701569.2	220504950.8	15921018	1205008	0	0.0947439260828944	0.0792240441453826	0.00572017738511216	0.00043294087793125	0
IBS2	90	300	448581940.7	384677789.7	33139035.1	4562939.9	0	0.161168605711134	0.138208825164124	0.011906346638353	0.00163939426647253	0
IBS2	90	400	576302434.9	500147500.5	42325180.7	7827737.5	0	0.207056618810434	0.179695319833221	0.0152067877481783	0.00281238593060409	0
IBS2	90	500	711730472.9	636673843.9	58862560.8	13898866.2	0	0.255713834088861	0.228747139383249	0.0211484145748689	0.00499364928272425	0
IBS2	90	600	797366648.7	707378387.7	76921059.5999999	20336024.8	7524.99999999985	0.286481597567217	0.254150196679549	0.0276365560018075	0.00730642155947818	2.70361699377315e-06
IBS2	90	700	909592846.1	818080549.3	96619353.2	25630792.9	901734.899999995	0.326802747658537	0.293923784101368	0.0347138505300858	0.00920875046489323	0.000323979508241643
IBS2	90	800	1006162102.9	898813621.599999	125644668.6	28920980.1	3529975	0.361498599321066	0.322929937753169	0.0451422008244468	0.0103908642225829	0.00126826583356738
IBS2	90	871	1057699681	956082372.6	136340840.8	31966873.4	3819382.4	0.380015260047853	0.343505720931344	0.0489851713132501	0.0114852069318321	0.00137224547008083
IBS1+	90	100	826443770.8	758536027.5	156893671.6	50009600.5	17559292.4	0.296928561213673	0.272530351407072	0.0563694879406289	0.017967681829051	0.00630878423006945
IBS1+	90	200	1393021036.3	1311444249.2	349210619.5	116397984.7	40131179	0.500491075936776	0.471181788508074	0.125466015320434	0.0418200092326742	0.0144185166145587
IBS1+	90	300	1704374560.2	1617441338.4	499031590.1	188158838.3	62279888	0.612355617901854	0.581121845704919	0.179294390355352	0.0676025824261135	0.0223762077830022
IBS1+	90	400	1882369396.7	1800491760.8	611815444.3	238856782.8	78063388.7	0.676306430495247	0.646889052710633	0.219815897975067	0.0858175756885149	0.0280469773130688
IBS1+	90	500	2031120606.3	1960652897	712828502.2	299176865.2	98323156	0.729750456823337	0.704432490527556	0.256108339161969	0.107489655401796	0.0353260007233241
IBS1+	90	600	2106023662.8	2036565662.6	790711819.5	350475998.6	121308804.6	0.756661975286985	0.731706781972139	0.284090619585054	0.125920646607919	0.0435843914433054
IBS1+	90	700	2195373529.3	2131288058.7	883958197.2	393416648.5	135280554.2	0.788764010829944	0.76573908493385	0.317592611792032	0.141348562992412	0.0486042266129139
IBS1+	90	800	2259590861.8	2200763104.8	961848867.5	440003772	158281373.4	0.811836312682673	0.790700402578918	0.345577534035151	0.158086601369237	0.0568680678966115
IBS1+	90	871	2295580480.5	2241181437.5	1027424200.2	469977236.1	170652326.9	0.824766830253004	0.805222089110173	0.369137744514892	0.168855606937744	0.0613127615991734
