# Supplementary material for: Attacks on genetic privacy via uploads to genealogical databases
Source: eLife. 2020 Jan 7;9:e51810. doi: 10.7554/eLife.51810 (PMC6992384; doi:10.7554/eLife.51810)
Supplement: Figure 2—figure supplement 2—source data 1. [file elife-51810-fig2-figsupp2-data1.csv]

coverage	percentile	bait_sample_size	.1cM_totalbp	1cM_totalbp	3cM_totalbp	5cM_totalbp	8cM_totalbp	.1cM_fraction	1cM_fraction	3cM_fraction	5cM_fraction	8cM_fraction
average_of_haplotypes	50	100	54688052.75	44553289.75	11541352.25	2865870.25	0	0.0196485779098027	0.0160073131291165	0.00414663070753789	0.00102966319067762	0
average_of_haplotypes	50	200	106272140.5	87258841.25	24471729.75	8231239	0	0.0381819488399274	0.0313507622671705	0.00879231686632894	0.00295735782594136	0
average_of_haplotypes	50	300	156570472.5	128896048.25	36346989	12738118.25	1914252	0.0562533674649967	0.0463103716251044	0.0130589152336063	0.00457661036138107	0.000687761360473667
average_of_haplotypes	50	400	208120568.25	171413662	50077894	18207792	3621308.75	0.0747745255912871	0.0615862976143649	0.0179922186353187	0.00654178018209804	0.00130108064799995
average_of_haplotypes	50	500	251845401.25	206678658	62111768.5	22559973.75	5152383.75	0.0904841869266619	0.074256469371301	0.0223158050272302	0.00810545228034251	0.00185117239401208
average_of_haplotypes	50	600	294994627.5	240811649.5	74023557.5	27276165.75	6097686	0.105987041592132	0.0865199292872766	0.0265955279729632	0.00979990767397669	0.00219080498236451
average_of_haplotypes	50	700	328248571.75	272343272.5	82849373.75	30631124	7434063.25	0.117934673324263	0.0978487574313364	0.0297665082782681	0.0110052926757175	0.00267094481534682
average_of_haplotypes	50	800	365393792.5	299274514	92159183.5	34061481.75	8523962.25	0.131280380973055	0.10752473911676	0.0331113800189851	0.0122377675604513	0.00306252879646263
average_of_haplotypes	50	871	389249469.5	321559384	99312271.25	36950457.75	10234023.25	0.139851359542512	0.115531350842477	0.0356813746500616	0.0132757322924384	0.00367692746489968
IBS1	50	100	102991066	85136379	22831212.5	5731740.5	0	0.0370031091354708	0.0305881941598294	0.00820290419979364	0.00205932638135523	0
IBS1	50	200	197229218.5	164996048.5	48513539	16457792	0	0.0708614308046788	0.0592805475920302	0.0174301698961434	0.00591303204401125	0
IBS1	50	300	284479697.5	239980843.5	72011295.5	25332394	3629476	0.102209188643782	0.0862214334440701	0.0258725531239101	0.00910154032044629	0.0013040150155604
IBS1	50	400	365044333	308548183.5	98190629.5	35726960.5	7156782	0.131154825538791	0.110856626220392	0.0352783859861114	0.0128361485107859	0.00257132191839604
IBS1	50	500	434982823	369880350	120461383.5	44239139	10304767.5	0.156282651463421	0.132892332215652	0.0432799260497051	0.0158944435867501	0.00370234478802416
IBS1	50	600	495999209	422918525	142242584.5	53423401.5	11944279	0.178204902372155	0.15194813437495	0.0511055772348732	0.0191942081276503	0.00429139610402238
IBS1	50	700	544908342.5	467787787	158631225.5	58880198	14643313	0.195777203299906	0.168068971483423	0.0569937643860291	0.0211547513501038	0.00526111759095549
IBS1	50	800	599925103.5	509983806.5	176674431.5	65291293.5	16962580.5	0.215543881038372	0.183229353595023	0.0634764113446671	0.0234581595550876	0.00609439480372704
IBS1	50	871	632238676.5	539610012.5	192376661.5	71428933	20468046.5	0.227153651814761	0.193873594658494	0.0691179815597017	0.0256633192167292	0.00735385492979935
IBS2	50	100	2951090.5	1620731.5	0	0	0	0.00106028151840035	0.000582303950264921	0	0	0
IBS2	50	200	7843219.5	5066096	0	0	0	0.00281794837556058	0.00182017052992511	0	0	0
IBS2	50	300	15016849	9693122.5	0	0	0	0.00539532334210314	0.00348259012806982	0	0	0
IBS2	50	400	23474068	15698948.5	142528.5	0	0	0.00843387231332727	0.00564039122245453	5.12083022853161e-05	0	0
IBS2	50	500	32864126	22298701.5	936642	0	0	0.0118075760184855	0.00801158117135894	0.000336521093459365	0	0
IBS2	50	600	44566378	29284772.5	2198558.5	0	0	0.0160120155364412	0.0105215692478116	0.000789908321914222	0	0
IBS2	50	700	54578320	36396542.5	3049540	0	0	0.0196091526170886	0.0130767190455267	0.00109565291258354	0	0
IBS2	50	800	67847706.5	45024113	3869688.5	0	0	0.0243766395059052	0.0161764726958625	0.00139031967962907	0	0
IBS2	50	871	75032155.5	50576206.5	4414247.5	0	0	0.0269579017527221	0.0181712546676389	0.00158597136953101	0	0
IBS1+	50	100	106166738.5	87101023	22895110.5	5731740.5	0	0.0381440795192127	0.0312940605924027	0.00822586177038077	0.00205932638135523	0
IBS1+	50	200	204978164	169751516.5	48712432	16462478	0	0.0736455079791137	0.060989114249591	0.0175016290981025	0.00591471565188272	0
IBS1+	50	300	299022362.5	249394067.5	72294088.5	25476236.5	3828504	0.107434144953251	0.089603460337438	0.0259741563080324	0.00915322072276215	0.00137552272094733
IBS1+	50	400	388812037.5	323909551	99502924	36415584	7204158	0.139694196939347	0.116375729771302	0.0357498732566809	0.0130835603641961	0.00258834338799032
IBS1+	50	500	468530446.5	392396770	123490034.5	45119947.5	10304767.5	0.168335797642199	0.140982136302155	0.0443680738652278	0.016210904560685	0.00370234478802416
IBS1+	50	600	543517160	456711782.5	144722204	53903050.5	12195372	0.19527737278184	0.164089533079528	0.0519964664598953	0.019366538650899	0.00438160996472902
IBS1+	50	700	603522366.5	503058859.5	161812716	59941581.5	14643313	0.216836322417491	0.180741326433537	0.0581368250878667	0.0215360901497729	0.00526111759095549
IBS1+	50	800	664977516	553592568.5	182429228	66079029	16962580.5	0.238916214316903	0.198897312401748	0.0655440213929204	0.0237411808287618	0.00609439480372704
IBS1+	50	871	704242335.5	589268273	196270780	73285231	20468046.5	0.253023461261439	0.211715045418497	0.0705170785633384	0.0263302585945774	0.00735385492979935
average_of_haplotypes	10	100	23300479.5	18945060.35	2254230.2	0	0	0.00837150462980255	0.00680666938343108	0.000809910309182295	0	0
average_of_haplotypes	10	200	51851791	41716541.7	6935161.8	0	0	0.0186295525986945	0.0149881130978829	0.00249169718233179	0	0
average_of_haplotypes	10	300	79103134.5	64420935.45	10682804.95	0	0	0.0284205420192594	0.0231454532674268	0.00383816784106106	0	0
average_of_haplotypes	10	400	105281450.6	84812616.15	17204112.35	455239.45	0	0.0378260091656151	0.0304718711374756	0.00618117348999913	0.000163560546612089	0
average_of_haplotypes	10	500	128842578.25	105118702.5	20397688.9	1640753.95	0	0.046291160674851	0.0377675362714139	0.00732857652408492	0.000589497709212028	0
average_of_haplotypes	10	600	154356633.2	122627594.25	25582890	2375818.95	0	0.0554579689861976	0.0440582123215714	0.00919153968821668	0.000853595280710752	0
average_of_haplotypes	10	700	173699087.4	141090391.85	30148490.15	4120486.55	0	0.0624074158800713	0.050691612101499	0.0108318897416803	0.0014804275693281	0
average_of_haplotypes	10	800	196418977.35	158124810.6	35968567.7	5017439.05	0	0.0705703235964138	0.056811817285758	0.0129229542691564	0.00180268883465798	0
average_of_haplotypes	10	871	212068855.5	170596373	39314641.4	5635716.05	0	0.0761930845953267	0.061292658221777	0.0141251471884571	0.00202482627041334	0
IBS1	10	100	44795119.1	36506067	4429583.1	0	0	0.016094198702572	0.0131160695172124	0.0015914812152147	0	0
IBS1	10	200	98987695.5	81277645.4	13792146	0	0	0.0355647595652156	0.0292018104076163	0.00495530635298354	0	0
IBS1	10	300	148562945	121629203.4	21365609.9	0	0	0.0533763857471088	0.0436995058141312	0.00767633568212212	0	0
IBS1	10	400	193624706.6	158994588.8	33443293.7	910478.9	0	0.0695663850070579	0.0571243152422143	0.0120156620830656	0.000327121093224177	0
IBS1	10	500	233329664.9	193754911	40303048.8	3193869.3	0	0.0838317670664514	0.069613165449384	0.0144802667955549	0.00114750821466718	0
IBS1	10	600	278369582.8	227086821	51162072	4751637.9	0	0.100013918220284	0.081588809078742	0.0183817471489499	0.0017071905614215	0
IBS1	10	700	310494923.6	254577875.9	59818622	8186788.9	0	0.111556060056515	0.0914659231258373	0.02149191268881	0.00294138758730549	0
IBS1	10	800	349854229.1	285506444	68315168.4	9599398.6	0	0.125697254370523	0.102578082901018	0.0245445913911918	0.00344891656943026	0
IBS1	10	871	373715680.8	309132623.7	74106395.9	11169656.2	0	0.13427030770105	0.111066606613291	0.0266252905385415	0.00401308602218262	0
IBS2	10	100	224163.1	0	0	0	0	8.0538361001579e-05	0	0	0	0
IBS2	10	200	1603921.6	453560.1	0	0	0	0.00057626441122125	0.000162957181934548	0	0	0
IBS2	10	300	3939721.3	1688696.4	0	0	0	0.00141548138968907	0.000606722695596496	0	0	0
IBS2	10	400	6190122.4	3588045.3	0	0	0	0.00222401596201677	0.00128912960099775	0	0	0
IBS2	10	500	9185036.1	5197607	0	0	0	0.00330004248350569	0.00186742041357536	0	0	0
IBS2	10	600	13023585.7	7792621.4	0	0	0	0.00467917443433644	0.00279976925489445	0	0	0
IBS2	10	700	15950337.1	9910244.9	0	0	0	0.00573071128770381	0.00356059887363378	0	0	0
IBS2	10	800	20836944	13021949.2	0	0	0	0.00748639413909642	0.00467858646500616	0	0	0
IBS2	10	871	23079291.2	14672393.6	0	0	0	0.00829203506877878	0.00527156580415803	0	0	0
IBS1+	10	100	45740592.7	37008053.3	4508460.4	0	0	0.0164338928543493	0.013296425489481	0.00161982061836459	0	0
IBS1+	10	200	100700733.3	82382829	13870323.6	0	0	0.0361802277521997	0.0295988859108986	0.00498339436466359	0	0
IBS1+	10	300	153011913.6	125086038.3	21365609.9	0	0	0.0549748318749126	0.0449414935324446	0.00767633568212212	0	0
IBS1+	10	400	202668262.4	164121510.1	33971729.4	910478.9	0	0.0728155957904487	0.0589663393687814	0.0122055209187648	0.000327121093224177	0
IBS1+	10	500	245338578.2	201308065.3	40795377.8	3281507.9	0	0.088146385282349	0.0723268978509881	0.0146571530481698	0.00117899541842406	0
IBS1+	10	600	294765041.8	235894874.9	51163926	4751637.9	0	0.105904554974186	0.0847534076443381	0.0183824132626916	0.0017071905614215	0
IBS1+	10	700	329673516.1	269887289.5	60296980.3	8240973.1	0	0.1184466339568	0.0969663604379519	0.0216637794833605	0.00296085513865619	0
IBS1+	10	800	371921098.3	300794563.3	70317028.3	9794528.5	0	0.13362554175504	0.108070869498003	0.0252638289253835	0.00351902374732172	0
IBS1+	10	871	398518137.6	326262002	76377150.5	11260882.2	0	0.143181449719895	0.117220929306268	0.0274411378109998	0.00404586212369411	0
average_of_haplotypes	90	100	240808345.95	206529661.05	68703520.15	22546601.7	7578654.6	0.08651874237247	0.0742029370542192	0.0246841202138976	0.00810064790803399	0.00272289426797308
average_of_haplotypes	90	200	499731027.55	430343112.5	156421402.95	57809948.3	19486210.6	0.179545687495007	0.154615674698771	0.0561998090638493	0.0207702270608678	0.0070010963617812
average_of_haplotypes	90	300	731499129.2	636615528.45	234992697.45	94905968.8	31093474.3	0.262816408855205	0.228726187537186	0.0844292691346744	0.0340982578150418	0.0111714080415854
average_of_haplotypes	90	400	873925453.15	767144828.8	295538025.95	121197673.65	39435183.5	0.313988000854124	0.275623361571949	0.106182276314233	0.0435444637987932	0.0141684561147063
average_of_haplotypes	90	500	1012833681.85	888763982.25	356421879.45	154053601.8	48489427.25	0.363895595231301	0.319319256593308	0.128056910330047	0.055349094455608	0.0174215069144757
average_of_haplotypes	90	600	1093717746.05	966369999.8	403866934.55	184371159.6	59522468.85	0.392955997955097	0.347201907472676	0.14510319036179	0.0662417276088015	0.0213855094078666
average_of_haplotypes	90	700	1215323888.55	1078538706.5	465345379.9	209858495.7	67668534.75	0.436647218341835	0.387502402037949	0.167191452102523	0.0753989362474685	0.0243122658463565
average_of_haplotypes	90	800	1298758114.1	1152339177.1	514309720.85	237344107	80564236.7	0.466623854894564	0.414017778312052	0.184783588219643	0.0852740944926412	0.0289454936122906
average_of_haplotypes	90	871	1370403133.1	1226068882.05	553049091.6	249029014.05	86858390.7	0.492364810494246	0.440507729574338	0.198702049493766	0.0894723022363011	0.0312068865313372
IBS1	90	100	419886860.1	372615604.2	134160955	45058862.3	15157309.2	0.150858903711419	0.133875067064477	0.0482019718058262	0.0161889575859624	0.00544578853594617
IBS1	90	200	776119811.699999	694137695	297981115	112475570	38641396.6	0.27884793516494	0.249393019032633	0.1070600407093	0.0404107458387146	0.013883260665899
IBS1	90	300	998445650.7	916982164.5	419411192.9	184906814.1	60400015.3	0.35872619649056	0.329457616336098	0.150688003787791	0.0664341800485345	0.0217007983773078
IBS1	90	400	1100359880.6	1053760956.3	523523263.5	231290917.1	74422837.1	0.395342414944374	0.378600136721247	0.188093872668997	0.0830992762760065	0.0267389830044352
IBS1	90	500	1198205435.6	1151885747.9	609947800	285805871.1	94127859.7	0.430496820959413	0.413854868160478	0.219144882045791	0.102685662461942	0.0338186951591256
IBS1	90	600	1215373930.3	1184157119.1	668748998	328666214.8	116934389.2	0.436665197574486	0.425449476477911	0.240271249908519	0.118084726061448	0.042012731135895
IBS1	90	700	1222911813.1	1224980199.9	748301288.9	370336003.3	129651109.1	0.439373443160553	0.440116582788749	0.268853166927898	0.133056041452216	0.0465816533985785
IBS1	90	800	1222963603.6	1244007383.1	814169667.2	424871518.2	151999834.3	0.439392050692236	0.446952757651627	0.292518664193567	0.152649814853919	0.0546112073175004
IBS1	90	871	1220222650.3	1236391114.3	861248100	438334668.4	161688406	0.43840726824426	0.444216349178959	0.30943322246045	0.157486918065938	0.0580921624129835
IBS2	90	100	28754397.4	20689538.5	1731613.5	0	0	0.0103310136154615	0.00743343360557142	0.000622142150863401	0	0
IBS2	90	200	110379089.5	87816344.5999999	9478573.4	273782.599999999	0	0.0396575125753373	0.031551064663336	0.00340550592969656	9.83658857088916e-05	0
IBS2	90	300	222941279.8	164406418.6	22802513.5	4231958.7	0	0.0800993797582493	0.0590687026195815	0.00819259308961367	0.00152047780176297	0
IBS2	90	400	302928565.7	222862153.8	32792227.7	7473688.3	0	0.108837583804101	0.0800709510010068	0.0117817440629103	0.00268518148758059	0
IBS2	90	500	401607910.2	306892877.6	48553575.3	12409062.8	0	0.144291557588101	0.110261900218913	0.0174445543241896	0.00445838578908689	0
IBS2	90	600	467882334.799999	361282454.9	63892666.4	18055804.8	0	0.168102941056686	0.129803240481029	0.0229556543065146	0.0064871735140906	0
IBS2	90	700	567338893.299999	457898391.1	80991013.2	25357469	231898.3	0.203836155900912	0.164515863335464	0.0290988278578644	0.00911054938305345	8.33174996288526e-05
IBS2	90	800	663860284.999999	518111488.999999	100827862.4	29293707.8	2879848.2	0.238514810367723	0.186149505160071	0.0362259032864407	0.0105247795639477	0.00103468525355577
IBS2	90	871	730695728.199999	571873113.099999	113386359.1	31735766.2	3527057.8	0.262527759207841	0.205465231476298	0.0407379783820373	0.0114021736622901	0.00126721772838543
IBS1+	90	100	450845851.7	396711798.9	136081455.4	45058862.3	15157309.2	0.161981994183159	0.142532459951678	0.048891978120509	0.0161889575859624	0.00544578853594617
IBS1+	90	200	890957930	777086754.6	308685560.5	113279271.9	38641396.6	0.320107508343521	0.279195342906661	0.110905983667801	0.0406995035948299	0.013883260665899
IBS1+	90	300	1243498104.5	1094188227.7	453412137.6	185214488.6	61677264.2	0.446769781667902	0.393125034790206	0.162904021315401	0.0665447227736841	0.0221596943017355
IBS1+	90	400	1440264177.5	1299019874.2	560376213.2	235678148	77428185	0.517464811403559	0.466717901280564	0.201334571815787	0.0846755409958533	0.0278187583738226
IBS1+	90	500	1612726479	1474145999.5	662881147.9	294887737.4	96757023.4	0.57942786909401	0.529638029973552	0.23816302143712	0.10594863761993	0.0347633133197543
IBS1+	90	600	1730300887.8	1571733366.4	740173245.3	353104572.7	118144966.4	0.621670549448098	0.564699672967363	0.265932885625162	0.126865052934318	0.0424476729419009
IBS1+	90	700	1861026237.2	1700910352.9	829823451.3	394689046.6	131839469.3	0.668638160897238	0.611110981393384	0.29814282854036	0.141805716098858	0.0473678976278432
IBS1+	90	800	1947944428.9	1792857256.4	918858132.9	447396792.1	155068512.4	0.69986653300995	0.644146092466796	0.330131622986732	0.160742800010788	0.0557137362556506
IBS1+	90	871	2034269101	1869412597.8	977072483.1	470667044	165987726.8	0.730881662640709	0.671651251532995	0.351047145442836	0.169103444327894	0.0596368423832909
