# Supplementary material for: Attacks on genetic privacy via uploads to genealogical databases
Source: eLife. 2020 Jan 7;9:e51810. doi: 10.7554/eLife.51810 (PMC6992384; doi:10.7554/eLife.51810)
Supplement: Figure 2—source data 1. [file elife-51810-fig2-data1.csv]

coverage	percentile	bait_sample_size	.1cM_totalbp	1cM_totalbp	3cM_totalbp	5cM_totalbp	8cM_totalbp	.1cM_fraction	1cM_fraction	3cM_fraction	5cM_fraction	8cM_fraction
average_of_haplotypes	50	100	970610762.75	666511244	54536123.5	17688727.5	1402970.5	0.348725548506322	0.239467259245092	0.0195939920623407	0.00635528827471407	0.000504065765523254
average_of_haplotypes	50	200	1354563407.25	978485441.75	84680972.5	29530542.5	2816835.75	0.486673840130821	0.351554799797339	0.0304245735947164	0.0106098706363245	0.00101204584749075
average_of_haplotypes	50	300	1571834462.25	1178518934	107054104.5	36661938.25	4454147.5	0.56473599515448	0.423423763115732	0.0384628965022422	0.013172071664766	0.00160030682707939
average_of_haplotypes	50	400	1719337311	1320878481.5	125047818.75	43225969.5	6637934.75	0.617731504591086	0.474571363361162	0.0449277618347869	0.0155304273372122	0.00238490806560235
average_of_haplotypes	50	500	1821437639	1426160690.75	142037039.25	49302751.25	9532453.75	0.654414585235686	0.512397645098077	0.0510317279815989	0.017713721743425	0.00342486431240626
average_of_haplotypes	50	600	1903339951.25	1514029901.5	157975579	55313988.5	11622780.25	0.683840828854081	0.54396770375763	0.056758200662533	0.0198734670168738	0.00417588653804539
average_of_haplotypes	50	700	1969023108.75	1583257684	172531506.75	58384469.75	13592819.5	0.707439779129388	0.568840183386632	0.0619879220744978	0.0209766437991412	0.00488369140112847
average_of_haplotypes	50	800	2018693131.75	1643641448.25	185526746	62218113.75	15378800.25	0.725285455975089	0.590535143011123	0.0666569120644578	0.0223540132431913	0.00552536687039782
average_of_haplotypes	50	871	2048307388.75	1682631379.75	192648996.5	66034526.25	16631723.25	0.735925403946274	0.604543626916698	0.0692158273449507	0.0237251916737891	0.00597552287234988
IBS1	50	100	1148203920	924619027	74805057.5	28044222	2744044	0.412532043910832	0.332201423809069	0.0268763089272002	0.0100758584951958	0.000985892889044704
IBS1	50	200	1237042847.5	1136962170	106559479	37215210	2893550	0.444450506913833	0.408493055692925	0.0382851851524277	0.0133708537120051	0.00103960809997773
IBS1	50	300	1219992222	1204392949	133780154.5	44395980.5	8076497.5	0.438324478893067	0.432719899547777	0.0480651560313362	0.0159507943302357	0.0029017615802215
IBS1	50	400	1186770630	1217255030.5	154042072.5	53101674.5	11629855.5	0.426388470827765	0.437341048002089	0.0553449521550889	0.0190786165549519	0.00417842856676767
IBS1	50	500	1145567485.5	1220570413.5	173392619	59472038.5	15676937	0.411584813463367	0.438532214223971	0.0622973064881385	0.0213673905572006	0.00563248282837367
IBS1	50	600	1103697578.5	1220657543	196631261	67627048	21222979	0.3965415985673	0.438563518515913	0.0706465938533759	0.0242973602938892	0.00762509058908861
IBS1	50	700	1061169103.5	1213010099.5	215324918.5	74493272	24768998	0.381261770297631	0.435815909452056	0.0773629380517515	0.0267642891828531	0.00889912078558598
IBS1	50	800	1028224584	1204248037	233594128.5	79759885.5	28518169	0.369425310128609	0.432667834890528	0.0839267847785038	0.0286565025726518	0.0102461403773683
IBS1	50	871	1000836519	1197127816.5	245505268.5	84314367	29778777.5	0.359585198771723	0.430109648957875	0.0882062745484987	0.0302928578658379	0.0106990576615005
IBS2	50	100	383138027.5	196868919	6610160.5	38008.5	0	0.137655612240498	0.0707319807248053	0.00237492920390277	1.36558706322696e-05	0
IBS2	50	200	714424128.5	398952798.5	33813311.5	3546015	0	0.256681623199231	0.143337616709366	0.0121486037989564	0.00127402875935876	0
IBS2	50	300	941510145	557809119.5	41311112.5	7002530	0	0.338270143233471	0.200412254453404	0.0148424486095251	0.00251590154251251	0
IBS2	50	400	1119642158.5	689253893.5	48700540	17954788.5	0	0.402270241417344	0.247638344118398	0.0174973564850407	0.00645087990806693	0
IBS2	50	500	1245809186.5	792573543.5	60369866.5	26346860	0	0.447600117956169	0.284759508441415	0.0216899663762418	0.00946602238253335	0
IBS2	50	600	1346296106.5	882493415.5	70025027.5	28940478	160051.5	0.483703525871641	0.31706633821113	0.0251589175200579	0.0103978695187667	5.75040472131418e-05
IBS2	50	700	1430180782	958886858.5	74029504	29720856	2744044	0.513842002177149	0.344513329667296	0.0265976644591364	0.0106782473556261	0.000985892889044704
IBS2	50	800	1500095810	1020756475.5	76780514.5	30408012.5	2758195	0.538961398565313	0.36674213337752	0.0275860603046976	0.0109251321384542	0.000990977126131599
IBS2	50	871	1543115615	1065677558.5	78657932.5	31373050.5	2773011	0.554417754162231	0.382881588975859	0.0282605877743609	0.0112718554788445	0.000996300287510967
IBS1+	50	100	1555295308	1128225095	93520360.5	32788127.5	2790869	0.558793730902927	0.405353958756596	0.0336004300214746	0.011780270923987	0.00100271639279665
IBS1+	50	200	1989452288	1556510785.5	134154698.5	45751876	3545352	0.714779669652861	0.559230433311505	0.0481997239414114	0.0164379467708444	0.00127379055363559
IBS1+	50	300	2195304571.5	1793526851.5	167233023.5	55100958	8363163	0.788739235350884	0.644386667708166	0.0600842583727141	0.0197969284281706	0.0030047560941522
IBS1+	50	400	2318522029	1947284400.5	197911618	66654367.5	12489362.5	0.833009376483977	0.699629394937045	0.0711066064704253	0.0239478911205587	0.00448723623872343
IBS1+	50	500	2396366649	2054472872	227527141	78670961	17645598.5	0.860977753561162	0.738140567439899	0.0817470092959776	0.0282652687144278	0.00633979268702976
IBS1+	50	600	2453566827	2136790515	252407593.5	86490961	22054363	0.88152889951301	0.767716033021581	0.0906861739726244	0.0310748746800499	0.00792379409882298
IBS1+	50	700	2497892146	2207595778.5	275398035	94187585.5	26073155.5	0.897454306250925	0.793155277360078	0.0989462867080063	0.0338401537222946	0.00936768455695565
IBS1+	50	800	2527254731.5	2257058954.5	298134438	102305454	29629862	0.908003832515234	0.810926637253711	0.107115127309744	0.0367567792677851	0.0106455546081535
IBS1+	50	871	2548222554	2287345541	315808801	107679456.5	31687483.5	0.915537249290439	0.821808142894214	0.113465254640098	0.0386875758768987	0.0113848264293034
average_of_haplotypes	10	100	744440663.75	469777492.85	27156355.15	3184061.15	0	0.267466103570804	0.168783842254011	0.00975686156444923	0.00114398429692399	0
average_of_haplotypes	10	200	1088234065.4	730581616.7	51488679.8	10054582	0	0.390985795670211	0.262486760697465	0.0184990923181697	0.0036124569781377	0
average_of_haplotypes	10	300	1291232217.55	901456675.75	67385663.75	16490342.95	0	0.463919915784138	0.323879546539269	0.0242106346380315	0.00592472710070008	0
average_of_haplotypes	10	400	1438980558.8	1034802589.1	83128687.5	21413207.65	1372022	0.517003626907766	0.371788686390866	0.0298668614212707	0.00769343682308762	0.000492946444522352
average_of_haplotypes	10	500	1542431038.5	1129568685.6	94536454.3	24736604.7	1409613	0.554171796333801	0.405836690235511	0.0339654969271155	0.00888748237012227	0.000506452313813106
average_of_haplotypes	10	600	1631159117.5	1218364807.3	102662854.9	28263689.15	1433749.5	0.586050433172239	0.437739773771627	0.0368851879251711	0.0101547096734436	0.000515124187775925
average_of_haplotypes	10	700	1699377156.25	1279298818.3	110561583.05	32072060.2	1444457.45	0.610560127371094	0.45963242860729	0.0397230797066375	0.01152299893449	0.000518971389847483
average_of_haplotypes	10	800	1754905567.75	1337424309.85	117682301.55	33781351.05	1804835	0.630510633280546	0.4805160255144	0.0422814445630462	0.0121371208998536	0.000648449511887928
average_of_haplotypes	10	871	1785764729.55	1371591122.8	122704112.65	35054068.5	2688045.85	0.6415978564375	0.492791636958212	0.0440857042081597	0.0125943887438525	0.000965773613302529
IBS1	10	100	973442461.7	693966524.7	34428103.1	3777589.4	0	0.349742934473427	0.249331520171249	0.0123694889839915	0.00135722988668937	0
IBS1	10	200	1151069111.6	933606932.4	56053519.4	7938916.2	0	0.413561463272981	0.335430640257955	0.0201391691176925	0.00285233073095832	0
IBS1	10	300	1126822268.2	1052577877.3	69851334.7	10009750.4	0	0.404849944620277	0.378175074596413	0.0250965123631442	0.00359634967240772	0
IBS1	10	400	1025827483.4	1109265996.5	85777909.6	12896153.1	1942	0.368564068677719	0.398542245681351	0.0308186862571298	0.00463338985720412	6.97730790951172e-07
IBS1	10	500	917299081.8	1108363356.9	97918998.4	15673811.7	39436.0000000001	0.329571479857413	0.398217941128286	0.0351807931013277	0.00563135995605598	1.41687494706233e-05
IBS1	10	600	851097932.2	1085617721.6	106502986.8	17276237.6	62642	0.305786422971582	0.390045783502871	0.0382648883721041	0.00620708698522572	2.25063090663044e-05
IBS1	10	700	770564505.3	1051132731.4	116112586.2	19656768	67269.2000000001	0.276851998847511	0.377655855857048	0.0417174699323955	0.0070623750176023	2.4168791000336e-05
IBS1	10	800	712136833.1	1001156177.7	125858104.1	22419652	89301.3	0.255859833071228	0.359700047235979	0.0452188849234335	0.00805503682945932	3.20845863449886e-05
IBS1	10	871	675624954.3	973447987.1	131325084.4	24418039.3	126564.6	0.242741675463485	0.349744919664834	0.047183087028909	0.00877302671177434	4.54727180558283e-05
IBS2	10	100	245468783.9	114389908	902545.6	0	0	0.0881931661917451	0.0410985380976682	0.000324270780307672	0	0
IBS2	10	200	493736362.7	246236079.2	5574711.8	0	0	0.177391896430497	0.0884688436153095	0.00200290837978312	0	0
IBS2	10	300	672727917.1	356242084.6	10320048	68307.6000000005	0	0.241700814466074	0.127992312800233	0.00370783483712361	2.45418721812444e-05	0
IBS2	10	400	820275742.4	457016585.9	16775273.6	1552286.1	0	0.29471248328672	0.164199044262518	0.00602709830965515	0.000557712568658861	0
IBS2	10	500	930027223.8	538534609.3	24666477.6	3460537.5	0	0.334144505905301	0.193487218795813	0.00886228677951974	0.00124331800565973	0
IBS2	10	600	1030467586.1	610283090.5	36019032.8	3931863.5	0	0.370231186353809	0.219265346775844	0.012941085604964	0.00141265820276367	0
IBS2	10	700	1108736200.5	668530846	40250632.9	4324680.4	0	0.398351898110742	0.240192871243479	0.0144614345672514	0.00155379128532597	0
IBS2	10	800	1173544574.9	719679485.3	42573311.2	4575843.4	0	0.421636552245846	0.258569792229506	0.0152959372281083	0.00164403029595813	0
IBS2	10	871	1213727005.5	751688886.1	44113339.2	5599183.7	0	0.43607348277359	0.270070278603377	0.0158492456495949	0.00201170075781766	0
IBS1+	10	100	1235880559.8	821057287.4	48616774.3	5645449	0	0.444032914783949	0.294993280408767	0.0174672607548062	0.00202832316995082	0
IBS1+	10	200	1680029737.3	1205302360.4	86430798.1	16599848	0	0.603608896718752	0.433046637104637	0.0310532590735602	0.00596407058429929	0
IBS1+	10	300	1904859760	1439435069.9	108607524.7	30041015.8	0	0.684386872809401	0.517166925769403	0.039021016535623	0.0107932758574205	0
IBS1+	10	400	2051571546.7	1606474736.5	129013689	35962767	2744044	0.737098165793979	0.577181713975911	0.0463526381408333	0.0129208701666852	0.000985892889044704
IBS1+	10	500	2144411367.3	1718865549.7	144177923.7	39838043.4	2788665.8	0.770454088275443	0.617562007997374	0.0518009149026254	0.0143131974930119	0.00100192481685504
IBS1+	10	600	2223242609.1	1807946324.1	153850084.1	42687811.8	2806966.7	0.798776943421054	0.649567362879276	0.0552759736699264	0.0153370755361425	0.00100850004931236
IBS1+	10	700	2278588119.7	1882613124.6	165985017	46227789.7	2819226	0.818661735844604	0.676393998188575	0.0596358687937454	0.0166089352581387	0.00101290462762621
IBS1+	10	800	2322537588.3	1944004705.9	180953612.5	47672278.5	2865592	0.834452105302978	0.698451051009477	0.0650138553939736	0.01712791791156	0.00102956321972366
IBS1+	10	871	2349235845.1	1980897756.1	188012555.1	50181271.2	2867499	0.844044379161928	0.711706157650387	0.0675500251177516	0.0180293604764733	0.00103024837555185
average_of_haplotypes	90	100	1135320919.3	842678746.2	110099743.05	38099964.9	11371032	0.407903379509062	0.302761538673464	0.0395571476837267	0.0136887325668841	0.00408543725607161
average_of_haplotypes	90	200	1631654270.45	1309719566.7	219486650.45	74710713.35	22201746.7	0.586228334026742	0.470562136559122	0.0788581844601965	0.0268424125222563	0.00797674679994261
average_of_haplotypes	90	300	1897442379.3	1578176088.4	312326398.85	114310140.85	33132162.4	0.681721921778198	0.56701444408834	0.112214081001309	0.0410698789850722	0.0119038773827367
average_of_haplotypes	90	400	2035218690.4	1727880939.9	374730495.25	141080078.6	44079152.9	0.73122283553625	0.620801099313017	0.134634914955874	0.050687906709079	0.0158369630367531
average_of_haplotypes	90	500	2153343869.7	1856194320.7	440842502.35	173267414.75	51432775.35	0.773663399276846	0.666902127467087	0.158387944309763	0.0622523225229568	0.0184790067073993
average_of_haplotypes	90	600	2221186017.45	1930096820.55	484397124.7	207295199.3	63768552.4	0.798038041609202	0.693454161284599	0.174036451571269	0.0744779831966887	0.0229110620514228
average_of_haplotypes	90	700	2282861262.35	2005969571.9	548448993.75	229634476.2	72377094.85	0.820197010407443	0.720714076223362	0.197049304946221	0.0825041424864489	0.0260039792154678
average_of_haplotypes	90	800	2329889003.6	2063479683.6	590696977.95	259614054.1	85101540.5	0.837093355978508	0.741376576596241	0.21222835717689	0.0932753446494506	0.0305756772215387
average_of_haplotypes	90	871	2359674142.85	2107804464.05	635200514.75	271319700.5	89718811.55	0.847794699319133	0.757301789841409	0.228217794834762	0.0974810037232234	0.0322345918362413
IBS1	90	100	1244624033.7	1078311253.3	177009028.5	63747200	22742064	0.447174310746827	0.38742068159452	0.0635966269108153	0.022903390461855	0.00817087451214323
IBS1	90	200	1298603479.8	1265329323.2	351949370.6	124731990.7	42033750.3	0.466568297164159	0.454613403444926	0.126450006551753	0.0448142896642766	0.0151020812788172
IBS1	90	300	1276043352.4	1282373912	463477017.8	193781883.8	62433533.7	0.45846278967973	0.460737262572043	0.166520178278725	0.0696228563624005	0.0224314103246023
IBS1	90	400	1251683430.2	1286911225.1	565298386.3	238485001.3	80891931.7	0.449710643549908	0.462367449522638	0.20310303305691	0.0856840003022863	0.0290632293957822
IBS1	90	500	1227087299.8	1285179078.5	632873087.2	296425756.1	99603128.5	0.440873631439542	0.461745115837128	0.22738158584128	0.106501224130768	0.0357858751954254
IBS1	90	600	1207386629.9	1279952334.8	706214983.2	329345579.2	120700945	0.433795483143149	0.459867227054481	0.253732203300568	0.118328811262352	0.0433659968194664
IBS1	90	700	1189528805.3	1272009528.8	777881307.7	374501464.4	135167968.5	0.427379440875989	0.45701349877809	0.279480813639368	0.134552627687015	0.0485637762990566
IBS1	90	800	1171296412.5	1269433610.1	844457210.1	409351796.3	156413024	0.420828822004065	0.456088010728668	0.303400513453909	0.147073816997776	0.0561967986357283
IBS1	90	871	1150899898.2	1263082475.6	880811660.799999	434597039.6	168526044.3	0.41350066749573	0.453806145590603	0.316462109561791	0.156144045409447	0.0605488208987184
IBS2	90	100	513206533.7	298658018.6	38730966.7	25346606	0	0.184387230010201	0.107303241782537	0.013915441827958	0.00910664647389685	0
IBS2	90	200	1005344254.9	653241717.8	66812275.1	28957478.3	2773011	0.361204759088359	0.23469972216421	0.02400462489741	0.0104039774656078	0.000996300287510967
IBS2	90	300	1338865351.8	939295724.9	78678778.6	31906858.1	2829761	0.481033769767524	0.337474536082147	0.0282680774581102	0.0114636443557568	0.0010166896914175
IBS2	90	400	1531761627.4	1122403964	89164913	33736798.7	2865592	0.550338440697453	0.403262515740705	0.0320355845893833	0.0121211139243622	0.00102956321972366
IBS2	90	500	1695726241.9	1272352620.7	109806982	36252009.2	2868583	0.60924840988545	0.457136766431414	0.0394519631322456	0.0130247904493744	0.00103063784011281
IBS2	90	600	1798705849.5	1374466405.4	130048134.2	41028628.4	3529975	0.646247402193683	0.493824681861768	0.0467242984228064	0.0147409564084313	0.00126826583356738
IBS2	90	700	1888930112.4	1486676441.4	149533853.4	44558993.3	3545352	0.678663594941471	0.534140025410141	0.0537252182321104	0.0160093623270839	0.00127379055363559
IBS2	90	800	1978994012.8	1568933242.2	176788221.3	49669529.7	5219049.59999999	0.711022171904519	0.56369363132327	0.0635172942731718	0.0178454996105838	0.00187512441061863
IBS2	90	871	2022673206.5	1625901812	188872569.3	53075727.4	6257132.7	0.726715435739951	0.584161564003966	0.067859015018882	0.0190692941602012	0.00224809173422113
IBS1+	90	100	1763671093.9	1388622481.9	200300057.2	67901079.3	22742064	0.633659952278354	0.498910742857191	0.0719647360132445	0.0243958155336906	0.00817087451214323
IBS1+	90	200	2258470445.2	1946866260.7	394471274.9	135775773.3	43099366.9	0.811433764196312	0.699479163725211	0.14172747406977	0.0487821512340967	0.0154849409663397
IBS1+	90	300	2452562134.9	2205687342.2	558758597.5	213128752.3	65218828.9	0.881167929063166	0.792469605491345	0.200753387324635	0.0765738892465063	0.0234321241366149
IBS1+	90	400	2534725788.6	2330368094.9	658416352.5	257467982.2	84501117.2999999	0.910688068653042	0.837265486128708	0.236558888983012	0.0925042939572646	0.0303599543820734
IBS1+	90	500	2597310124	2424502151	766601677.1	312757003.2	100622269.3	0.933173659713699	0.87108640755924	0.275428215503335	0.112368790534631	0.0361520368413958
IBS1+	90	600	2631195657.5	2478516098.7	830059243	369352972.5	124643096.1	0.945348211768672	0.890492789871865	0.298227544878847	0.13270285357497	0.0447823511989989
IBS1+	90	700	2659786674	2521360057.5	933079259.8	414807142.1	139466200.8	0.955620525134605	0.905885966628303	0.335241055592372	0.149033839005987	0.050108065188022
IBS1+	90	800	2679701643.6	2557881851.9	1016576501.5	465488196.6	160450580.4	0.96277566802378	0.919007686758925	0.365240332880519	0.167242763950645	0.0576474306751114
IBS1+	90	871	2693093632.8	2587232804.3	1070407084.8	490756009	173612625.3	0.967587204180796	0.929553033428967	0.384580835178806	0.176321101093517	0.0623763513747056
