# Supplementary material for: Attacks on genetic privacy via uploads to genealogical databases
Source: eLife. 2020 Jan 7;9:e51810. doi: 10.7554/eLife.51810 (PMC6992384; doi:10.7554/eLife.51810)
Supplement: Table 3—source data 1. [file elife-51810-table3-data1.csv]

Matching pairs	~	Target 1	Target 2	Target 3	Target 4
	target bp	27613130	34024097	37673781	42008068
T1-(B1~Bmiss)
	IBS L bp	27427698	33771672	37519864	40054428
	IBS R bp	27680780	34328741	37827711	43112674
	IBS cM	1.3	0.8	1.1	1.2
	\# SNPs	47	45	42	40
	\# SNPs B?	46	44	41	39
T2-(B1~B2~Bmiss)
	IBS L bp	27433179	33771672	37508507	40357667
	IBS R bp	27680780	34328741	37827711	43112674
	IBS cM	1.3	0.8	1.2	0.9
	\# SNPs	45	45	45	32
	\# SNPs B?	44	44	44	31
T3-(B3~ Bmiss)
	IBS L bp	27433179	33771672	37519864	40357667
	IBS R bp	27680780	34328741	37827711	43112674
	IBS cM	1.3	0.8	1.1	0.9
	\# SNPs	45	45	45	32
	\# SNPs B?	44	44	41	31
Tmiss-(All Baits)
	IBS L bp	27433179	33771672	37519864	40357667
	IBS R bp	27680780	34328741	37827711	43112674
	IBS cM	1.3	0.8	1.1	0.9
	\# SNPs	44	44	44	31
	\# SNPs B?	44	44	44	31
