# Supplementary figures and images for: Attacks on genetic privacy via uploads to genealogical databases
Source: eLife journal article supplement (doi:10.7554/elife.51810), 2020-01-06

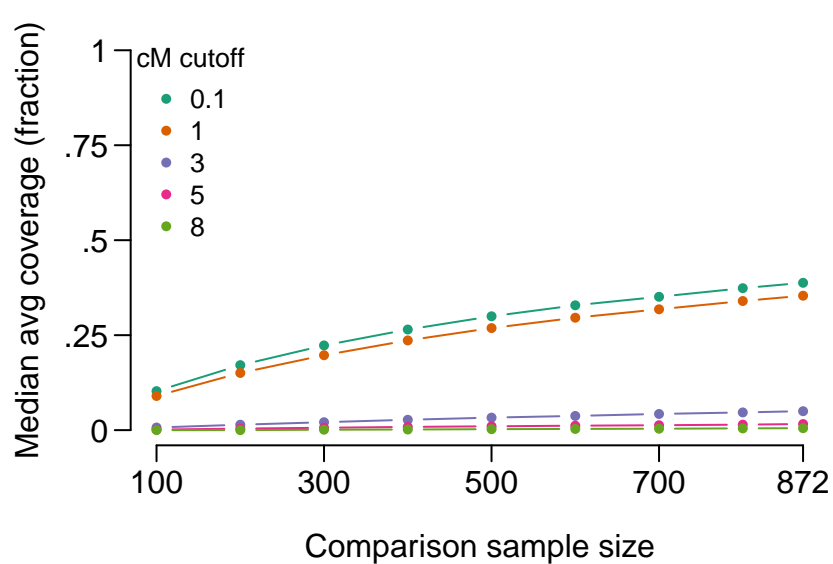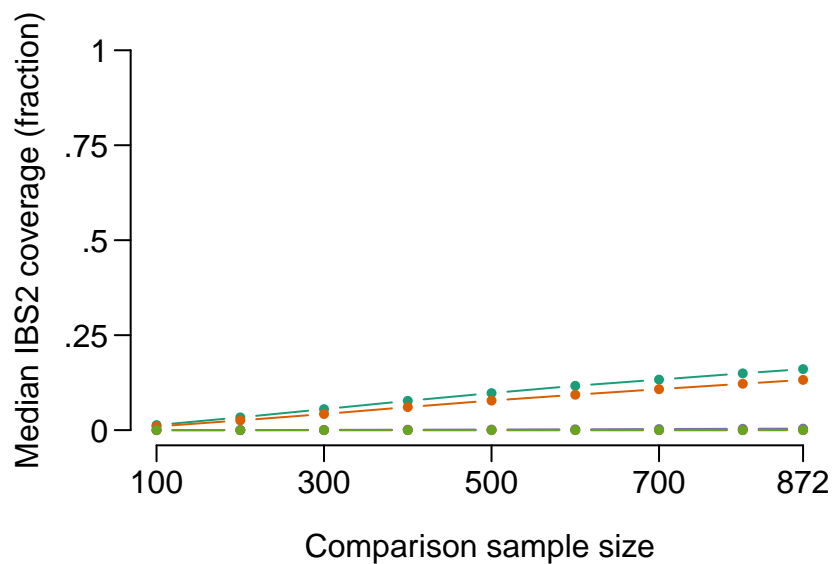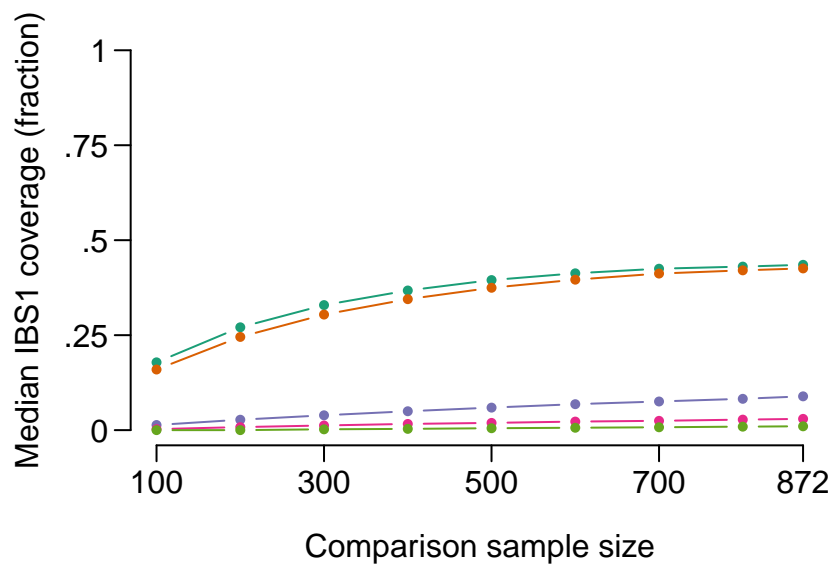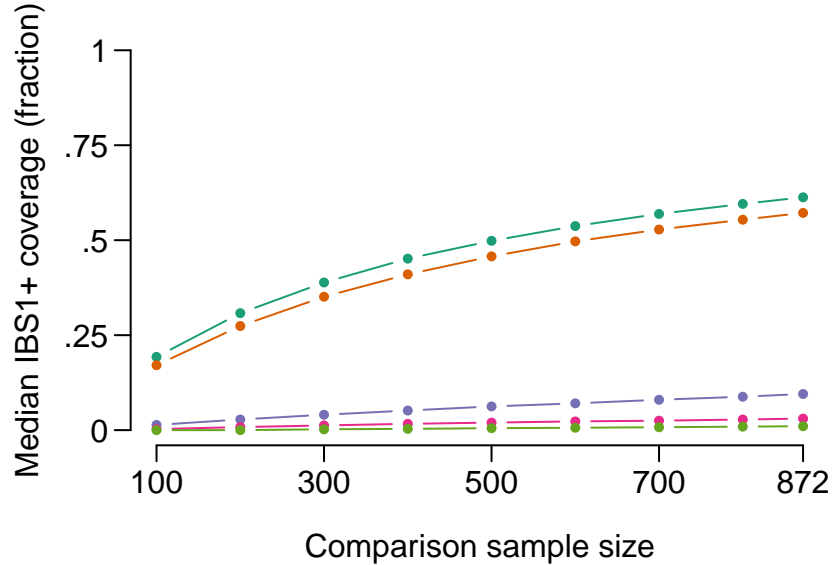

Supplement: supp [file elife_poa_e51810_Figure_2_figure_supplement_1.pdf › elife_poa_e51810_Figure_2_figure_supplement_1.pdf]

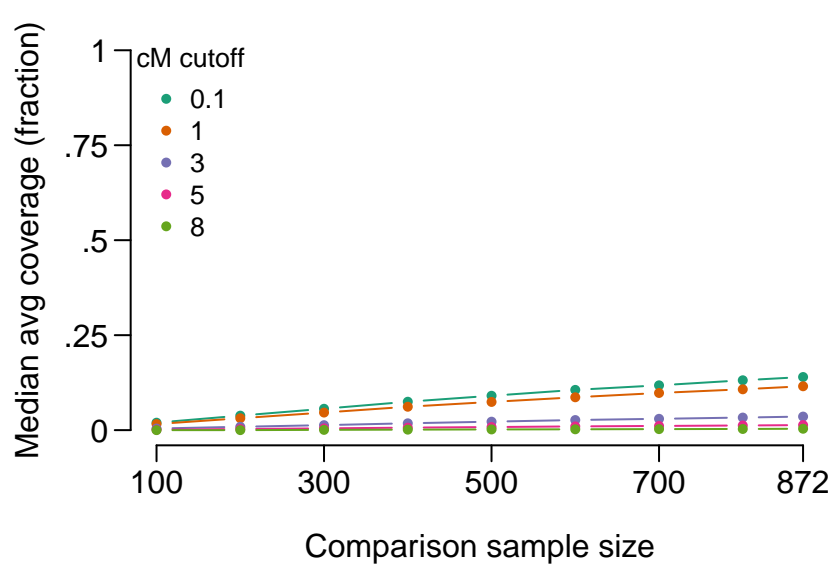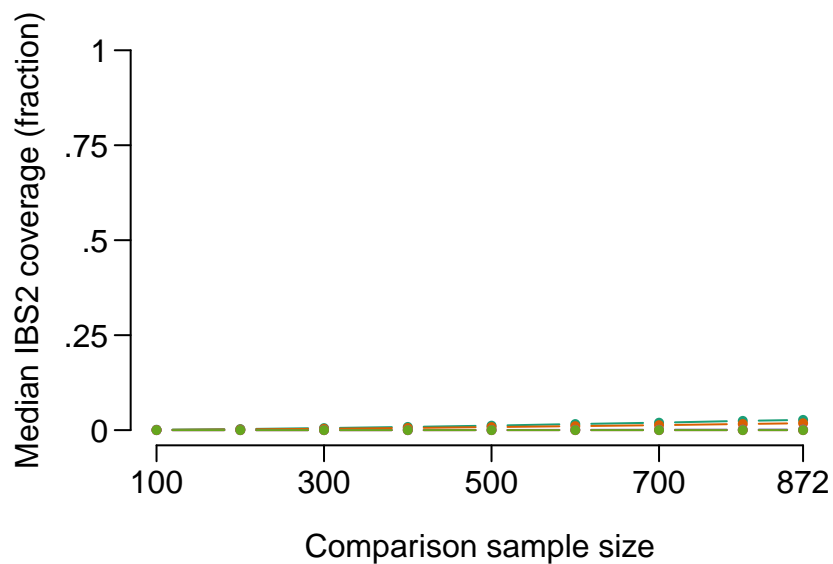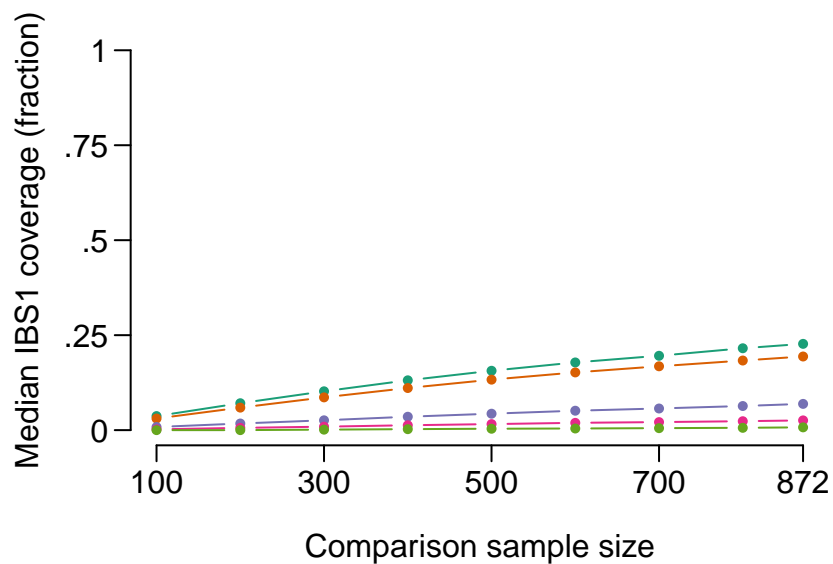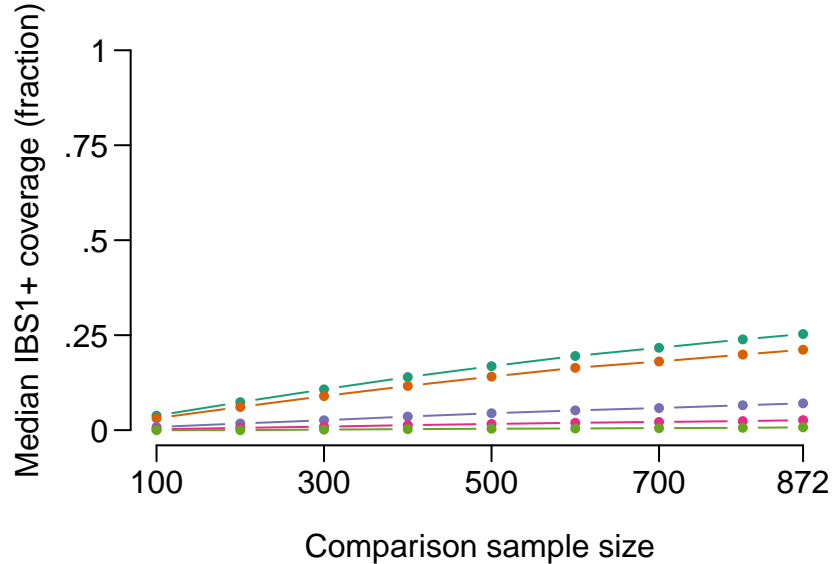

Supplement: supp [file elife_poa_e51810_Figure_2_figure_supplement_2.pdf › elife_poa_e51810_Figure_2_figure_supplement_2.pdf]

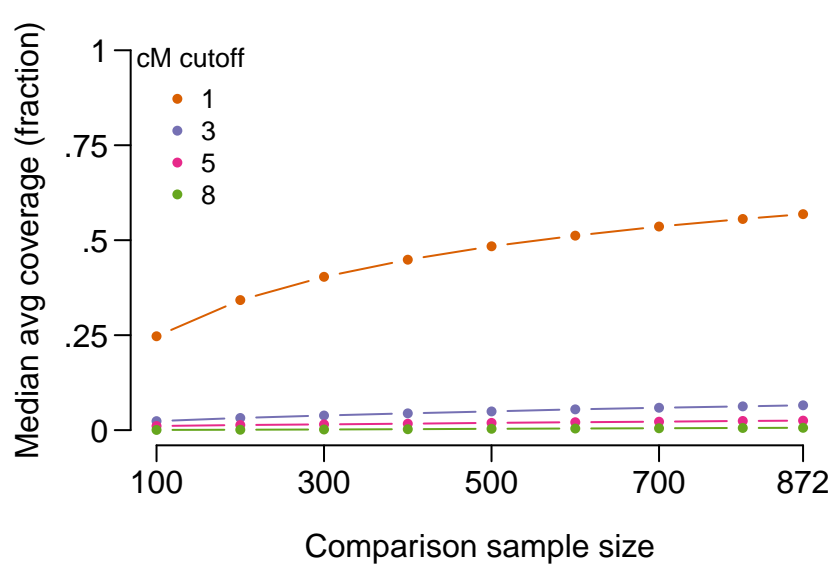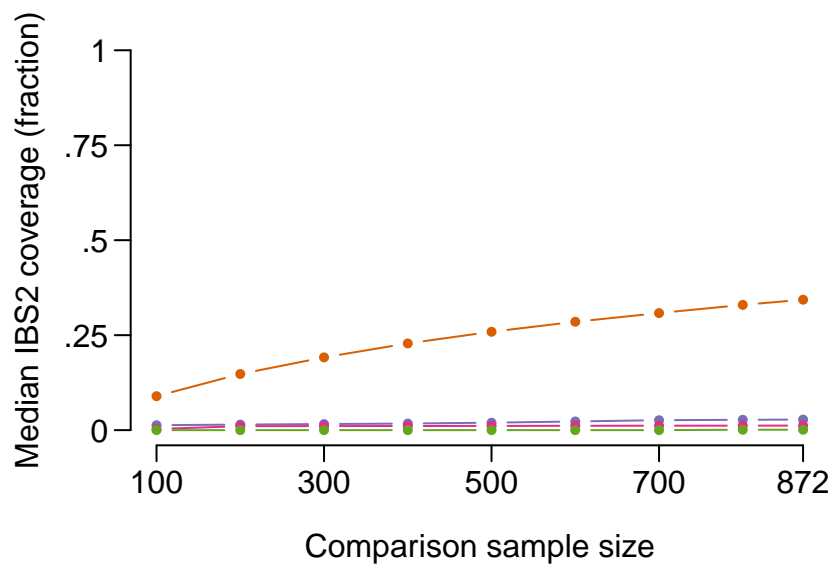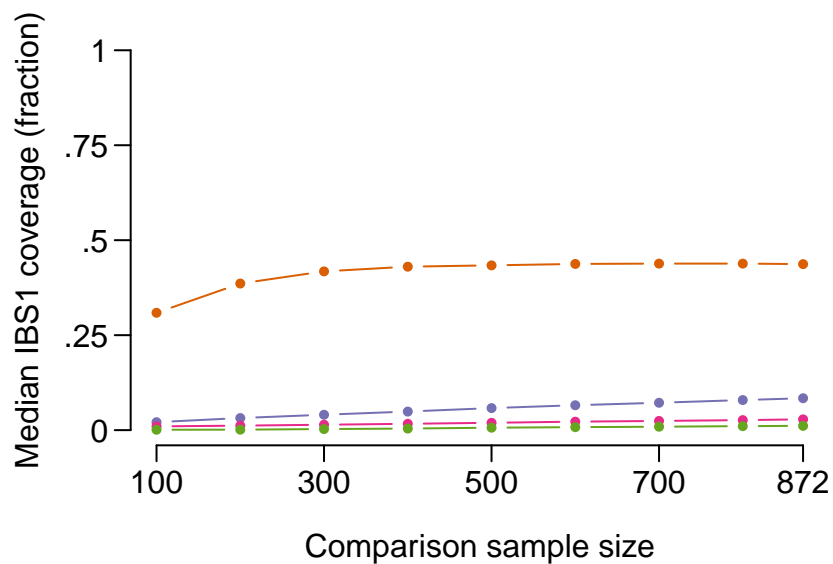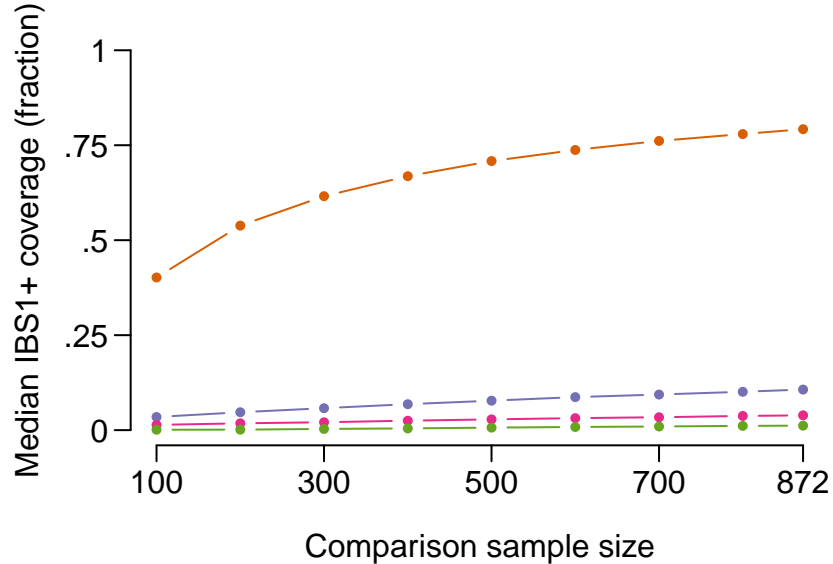

Supplement: supp [file elife_poa_e51810_Figure_2_figure_supplement_3.pdf › elife_poa_e51810_Figure_2_figure_supplement_3.pdf]

**Finnish in Finland**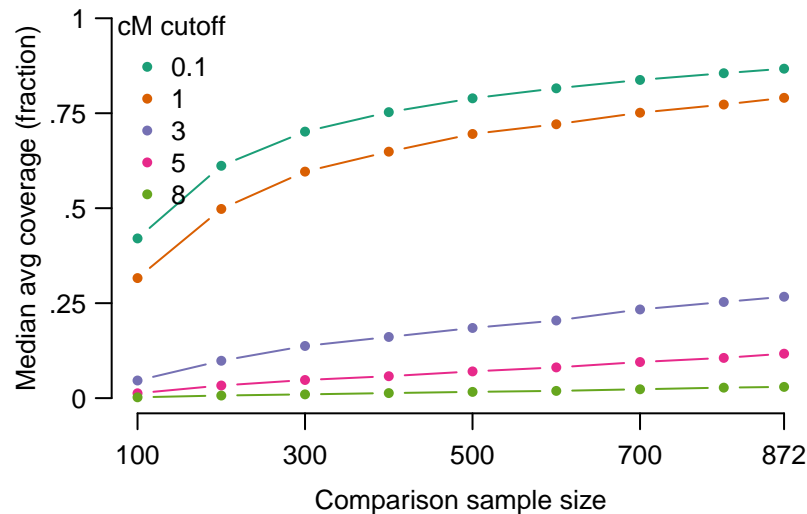**British in England and Scotland**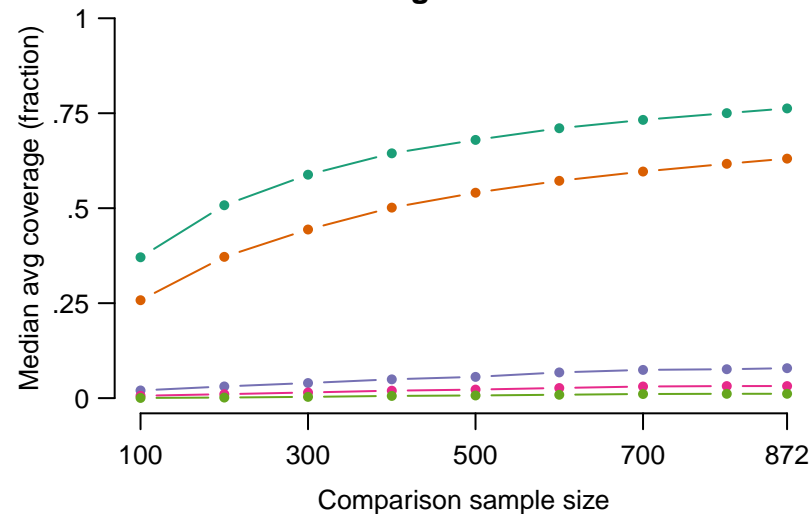**Iberian in Spain**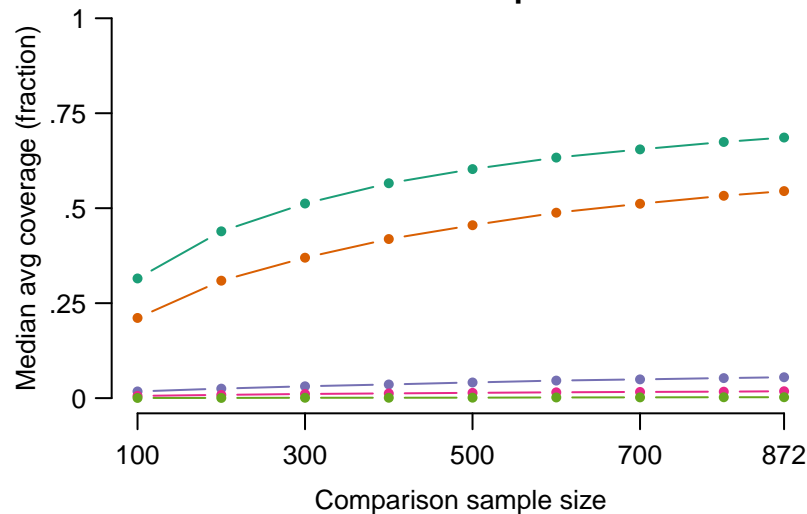**Toscani in Italia**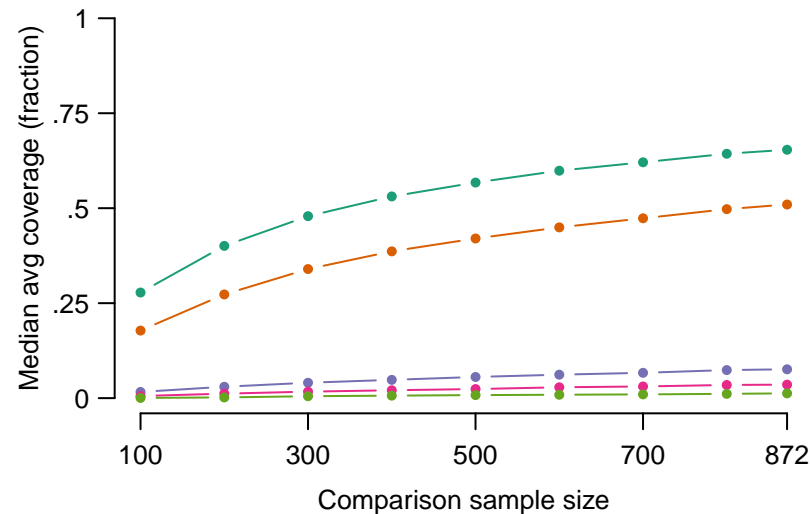

Supplement: supp [file elife_poa_e51810_Figure_2_figure_supplement_4.pdf › elife_poa_e51810_Figure_2_figure_supplement_4.pdf]

**total alleles covered**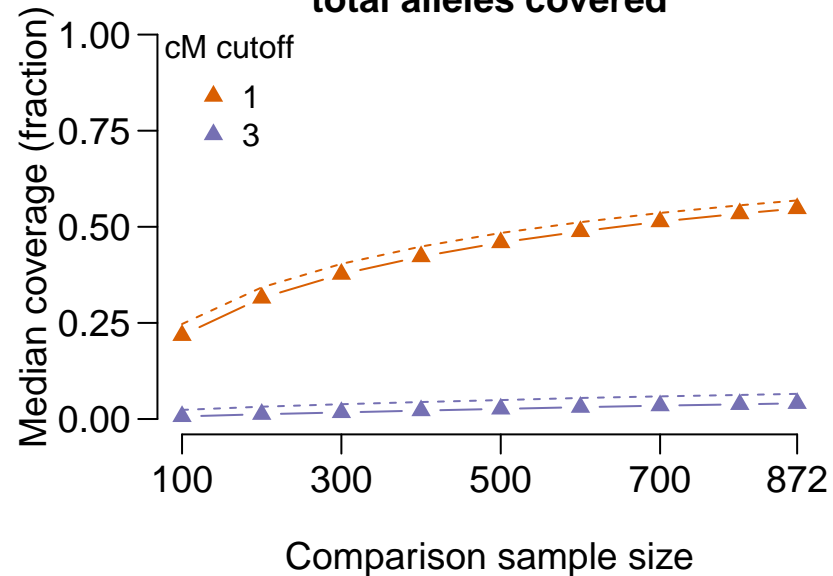**minor alleles covered**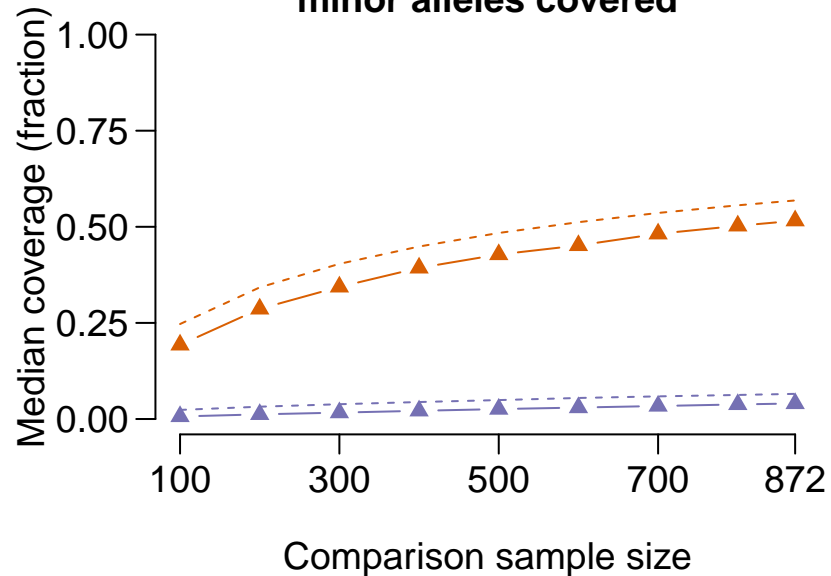

Supplement: supp [file elife_poa_e51810_Figure_2_figure_supplement_5.pdf › elife_poa_e51810_Figure_2_figure_supplement_5.pdf]

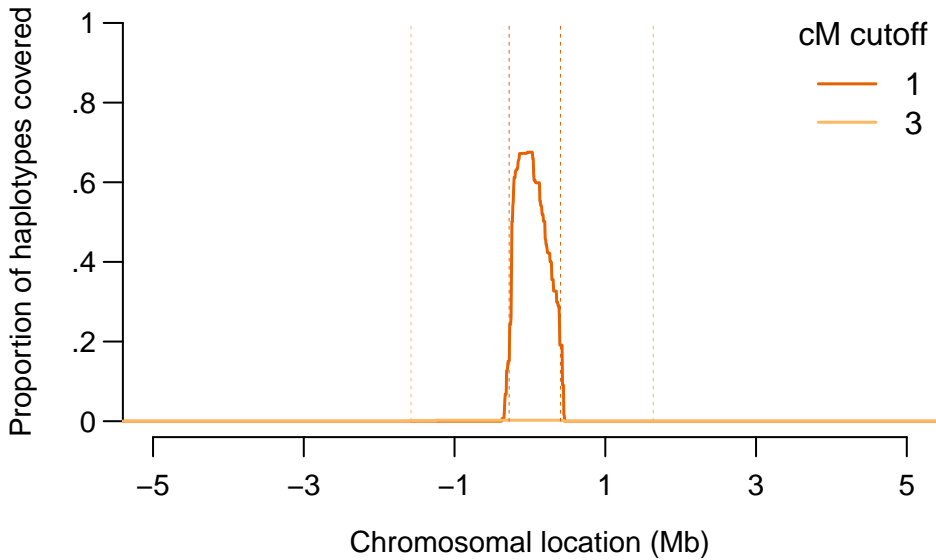

Supplement: supp [file elife_poa_e51810_Figure_3_figure_supplement_1.pdf › elife_poa_e51810_Figure_3_figure_supplement_1.pdf]

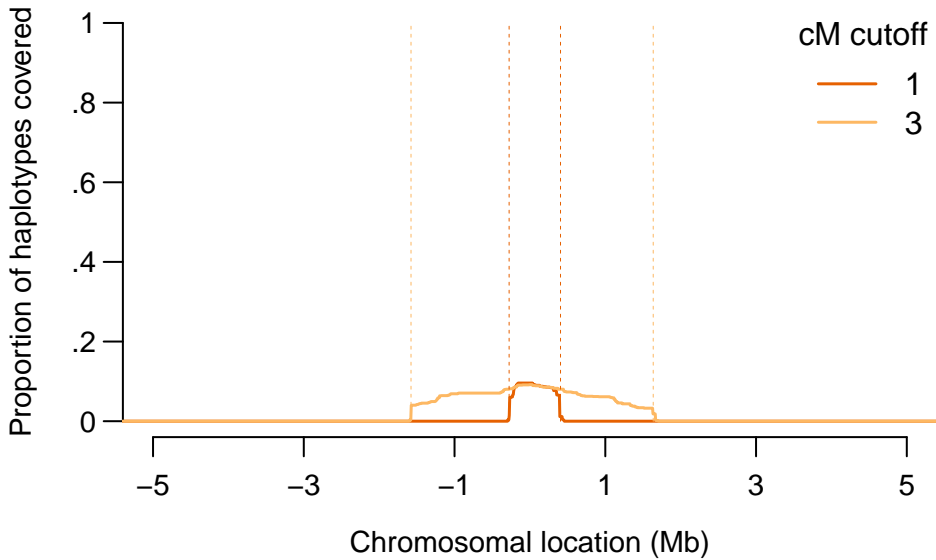

Supplement: supp [file elife_poa_e51810_Figure_3_figure_supplement_2.pdf › elife_poa_e51810_Figure_3_figure_supplement_2.pdf]
